# Supplementary material
Source: PubMed Central journal article supplement (PMC10122429)
Supplement: bgac092_suppl_supplementary_data_s1.pdf [file bgac092_suppl_supplementary_data_s1.pdf]

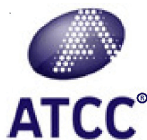

# Cell Line Authentication Service

## STR Profile Report

**Sample Submitted By:** NIH/NCI  
Shouhui Yang

**Email Address:** shouhui.yang@nih.gov

**ATCC Sales Order:** SO0895664

**FTA Barcode:** STRB8048

**Cell Line Designation:** CFPAC-1

**Date Sample Received:** Monday, October 04, 2021

**Report Date:** Friday, October 15, 2021

**Methodology:** Seventeen short tandem repeat (STR) loci plus the gender determining locus, Amelogenin, were amplified using the commercially available PowerPlex® 18D Kit from Promega. The cell line sample was processed using the ABI Prism® 3500xl Genetic Analyzer. Data were analyzed using GeneMapper® ID-X v1.2 software (Applied Biosystems). Appropriate positive and negative controls were run and confirmed for each sample submitted.

**Data Interpretation:** Cell lines were authenticated using Short Tandem Repeat (STR) analysis as described in 2012 in ANSI Standard (ASN-0002) Authentication of Human Cell Lines: Standardization of STR Profiling by the ATCC Standards Development Organization (SDO) and in Capes-Davis et al., Match criteria for human cell line authentication: Where do we draw the line? *Int. J. Cancer*. 2012 Nov 8. doi: 10.1002/ijc.27931

### **ATCC performs STR Profiling following ISO 9001:2008 and ISO/IEC 17025:2005 quality standards.**

There are no warranties with respect to the services or results supplied, express or implied, including, without limitation, any implied warranty of merchantability or fitness for a particular purpose. Neither ATCC nor Promega is liable for any damages or injuries resulting from receipt and/or improper, inappropriate, negligent or other wrongful use of the test results supplied, and/or from misidentification, misrepresentation, or lack of accuracy of those results. Your exclusive remedy against ATCC, Promega and those supplying materials used in the services for any losses or damage of any kind whatsoever, whether in contract, tort, or otherwise, shall be, at Promega's option, refund of the fee paid for such service or repeat of the service.

The ATCC trademark and trade name, any and all ATCC catalog numbers are trademarks of the American Type Culture Collection. PowerPlex is a registered trademark of Promega Corporation. Applied Biosystems, ABI Prism and GeneMapper are registered trademarks of Life Technologies Corporation.

### **Technical questions?**

ATCC Technical Support  
(800) 638-6597 / +1 703-365-2700  
tech@atcc.org

### **Ordering questions?**

800-638-6597 or 703-365-2700  
Fax 703-365-2750  
Email: sales@atcc.org

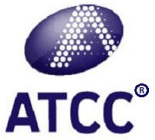

| Test Results for Submitted Sample                                                                                                                                                                                                                                                               |                        |      |  | ATCC Reference Database Profile                                       |    |  |     |
|-------------------------------------------------------------------------------------------------------------------------------------------------------------------------------------------------------------------------------------------------------------------------------------------------|------------------------|------|--|-----------------------------------------------------------------------|----|--|-----|
| Locus                                                                                                                                                                                                                                                                                           | Query Profile: CFPAC-1 |      |  | Database Profile: CFPAC-1; Pancreatic Carcinoma; Human (Homo sapiens) |    |  |     |
| D3S1358                                                                                                                                                                                                                                                                                         | 16                     |      |  |                                                                       |    |  |     |
| TH01                                                                                                                                                                                                                                                                                            | 8                      |      |  | 8                                                                     |    |  |     |
| D21S11                                                                                                                                                                                                                                                                                          | 30                     | 31.2 |  |                                                                       |    |  |     |
| D18S51                                                                                                                                                                                                                                                                                          | 12                     |      |  |                                                                       |    |  |     |
| Penta_E                                                                                                                                                                                                                                                                                         | 10                     | 12   |  |                                                                       |    |  |     |
| D5S818                                                                                                                                                                                                                                                                                          | 10                     | 11   |  | 10                                                                    | 11 |  |     |
| D13S317                                                                                                                                                                                                                                                                                         | 12                     |      |  | 12                                                                    |    |  |     |
| D7S820                                                                                                                                                                                                                                                                                          | 8                      | 10   |  | 8                                                                     | 10 |  |     |
| D16S539                                                                                                                                                                                                                                                                                         | 9                      | 11   |  | 9                                                                     | 11 |  |     |
| CSF1PO                                                                                                                                                                                                                                                                                          | 10                     |      |  | 10                                                                    |    |  |     |
| Penta_D                                                                                                                                                                                                                                                                                         | 11                     | 13   |  |                                                                       |    |  |     |
| Amelogenin                                                                                                                                                                                                                                                                                      | X                      | Y    |  | X                                                                     | Y  |  |     |
| vWA                                                                                                                                                                                                                                                                                             | 17                     |      |  | 17                                                                    |    |  |     |
| D8S1179                                                                                                                                                                                                                                                                                         | 11                     | 15   |  |                                                                       |    |  |     |
| TPOX                                                                                                                                                                                                                                                                                            | 8                      |      |  | 8                                                                     |    |  |     |
| FGA                                                                                                                                                                                                                                                                                             | 21                     | 22   |  |                                                                       |    |  |     |
| D19S433                                                                                                                                                                                                                                                                                         | 13                     | 15   |  |                                                                       |    |  |     |
| D2S1338                                                                                                                                                                                                                                                                                         | 18                     | 23   |  |                                                                       |    |  |     |
| Number of shared alleles between query sample and database profile:                                                                                                                                                                                                                             |                        |      |  |                                                                       |    |  | 13  |
| Total number of alleles in the database profile:                                                                                                                                                                                                                                                |                        |      |  |                                                                       |    |  | 13  |
| Percent match between the submitted sample and the database profile:                                                                                                                                                                                                                            |                        |      |  |                                                                       |    |  | 100 |
| <i>The allele match algorithm compares the 8 core loci plus amelogenin only, even though alleles from all loci will be reported when available.</i>                                                                                                                                             |                        |      |  |                                                                       |    |  |     |
| <b>NOTE:</b> Loci highlighted in grey (8 core STR loci plus Amelogenin) can be made public to verify cell identity. In order to protect the identity of the donor, <b>please do not publish</b> the allele calls from all the STR loci tested. Electropherograms showing raw data are attached. |                        |      |  |                                                                       |    |  |     |

**Explanation of Test Results**

Cell lines with 80% match are considered to be related; i.e., derived from a common ancestry. Cell lines with between a 55% to 80% match require further profiling for authentication of relatedness.

- The submitted sample profile is human, but not a match for any profile in the ATCC STR database.
- The submitted profile is an exact match for the following ATCC human cell line(s) in the ATCC STR database (8 core loci plus Amelogenin): CRL-1918
- The submitted profile is similar to the following ATCC human cell line(s):
- An STR profile could not be generated.

**Additional Comments:**

n/a

|                          |                   |
|--------------------------|-------------------|
| e-Signature, Technician: | gsykes 10/15/2021 |
| e-Signature, Reviewer:   | Bchase 10/15/2021 |

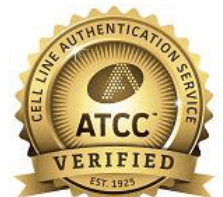

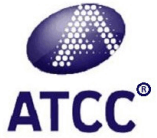

**Addendum: Comparative Output from the ATCC STR Profile Database**

| % Match | ATCC® Cat. No. | Designation                                                  | D5S818 | D13S317 | D7S820 | D16S539 | vWA | TH01 | AMEL | TPOX | CSF1PO |
|---------|----------------|--------------------------------------------------------------|--------|---------|--------|---------|-----|------|------|------|--------|
| 100     | STRB8048       | CFPAC-1                                                      | 10,11  | 12      | 8,10   | 9,11    | 17  | 8    | X,Y  | 8    | 10     |
| 100     | CRL-1918       | CFPAC-1;<br>Pancreatic<br>Carcinoma; Human<br>(Homo sapiens) | 10,11  | 12      | 8,10   | 9,11    | 17  | 8    | X,Y  | 8    | 10     |

**Definitions of terms used in this report:**

**Peak Area Difference (PAD):**

Refers to a heterozygous peak imbalance.

Two alleles at a single locus should amplify in a similar manner; and therefore produce peaks of similar height and area. Peaks which are above threshold (50 rfu) but are not of similar area, within 50% of each other, are referred to as a PAD. Due to their nature cell lines do not amplify in the same manner as a sample taken from a fresh buccal swab. PAD is far more common in cell line samples.

**Stutter:**

A stutter peak is a small peak which occurs immediately before the true peak. It is defined as being a single repeat unit smaller than the true peak. The stutter peak should be less than 15% of the true peak. The stutter is caused by the polymerase.

**+4 Peak:**

A +4 is similar to a stutter but occurs immediately after the true peak. A stutter peak should be less than 5% for a homozygous and 10% for a heterozygous.

**Below Threshold Peak(s):**

Cell lines can produce unusual profiles and occasionally a peak will amplify poorly and be below threshold. Where we find a below threshold peak which we believe is valid we indicate it as a below threshold peak. Our cell line analysis criteria, Homozygous and Heterozygous peaks must be equal to or above the set height threshold for it to be considered a true peak.

**Ladder/ Off Ladder Peak(s):**

The allelic ladder consists of most or all known alleles in the population and allows for precise assignment of alleles. Those which do not align are termed 'off ladder'.

**Artifact:**

A non-allelic product of the amplification process, an anomaly of the detection process, or a by-product of primer synthesis

**Pull-up:**

A term used to describe when signal from one dye color channel produces artificial peaks in another, usually adjacent, color.

**Spike:**

An extraneous peak resulting from dust, dried polymer, an air bubble, or an electrical surge.

**Dye blob:**

Free dye not coupled to primer that can be injected into the capillary (A known and documented dye blob is often found at the D3S1358 locus.)

Sample Name  
STRB8048\_CFPAC-1

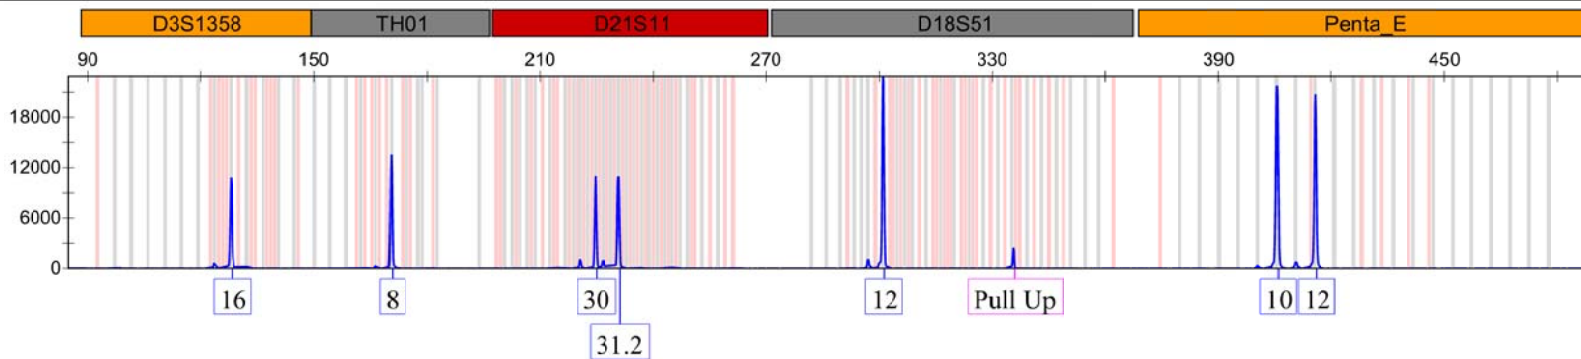

STRB8048\_CFPAC-1

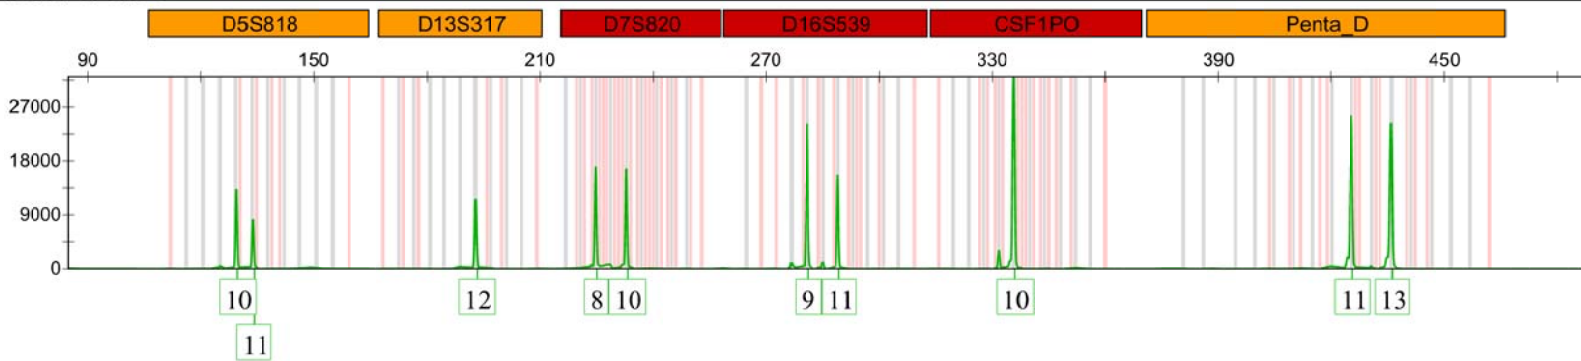

Sample Name  
STRB8048\_CFPAC-1

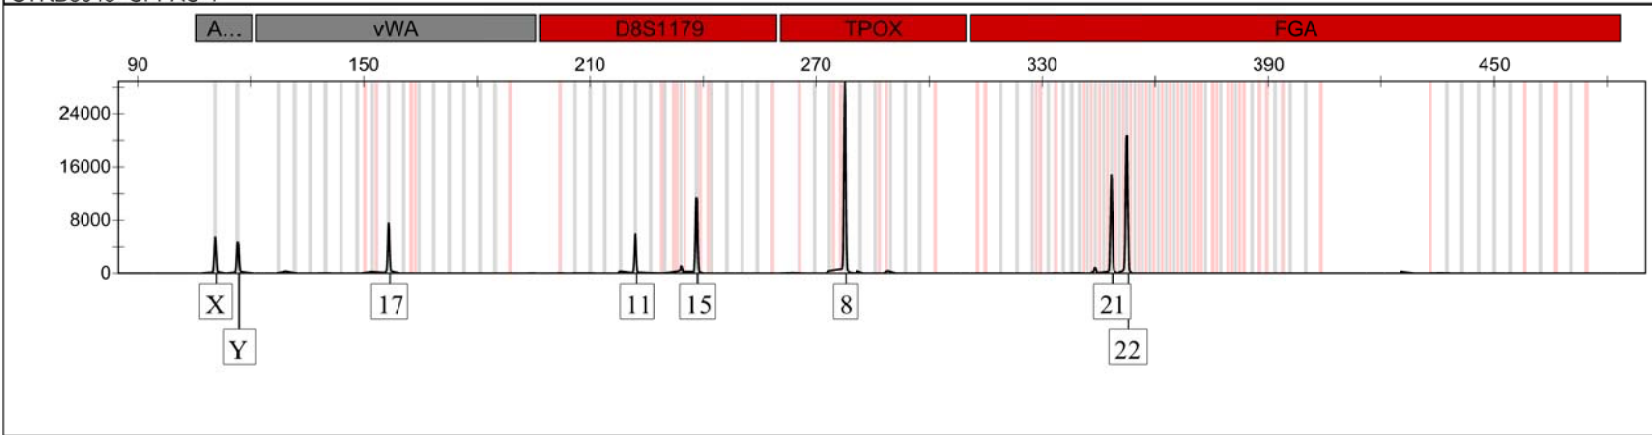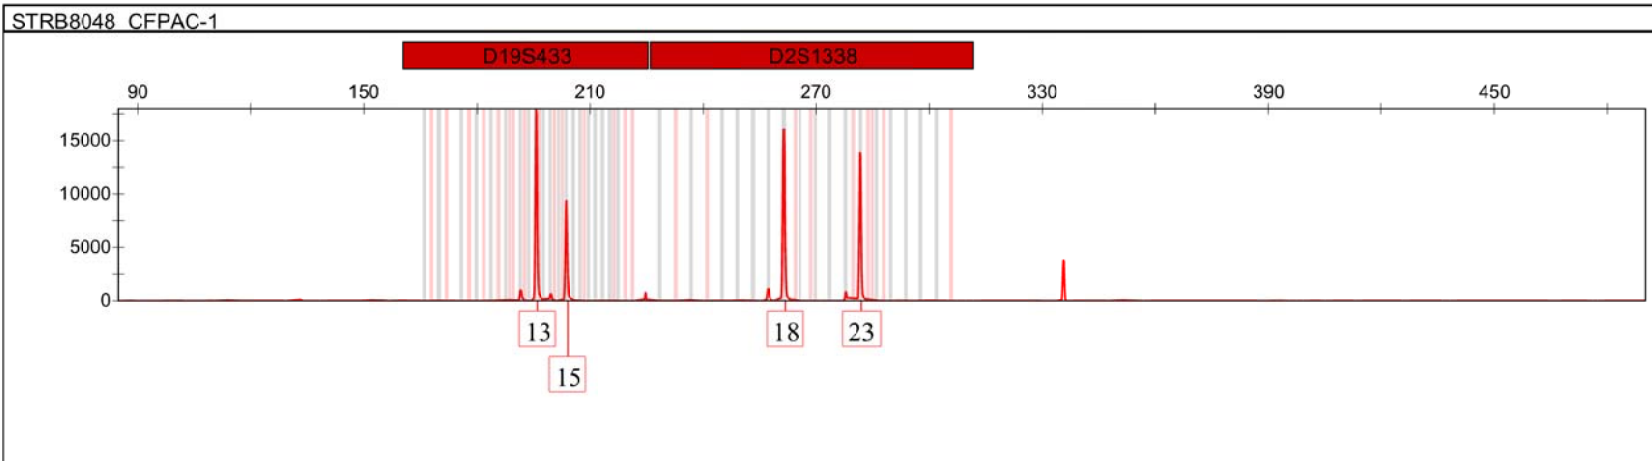

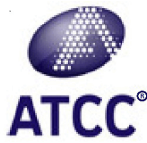

# Cell Line Authentication Service

---

## STR Profile Report

**Sample Submitted By:** National Institutes of Health  
Shouhui Yang

**Email Address:** shouhui.yang@nih.gov

**ATCC Sales Order:** SO0895664

**FTA Barcode:** STRB8050

**Cell Line Designation:** Capan-2 P9

**Date Sample Received:** Monday, March 28, 2022

**Report Date:** Wednesday, March 30, 2022

**Methodology:** Seventeen short tandem repeat (STR) loci plus the gender determining locus, Amelogenin, were amplified using the commercially available PowerPlex® 18D Kit from Promega. The cell line sample was processed using the ABI Prism® 3500xl Genetic Analyzer. Data were analyzed using GeneMapper® ID-X v1.2 software (Applied Biosystems). Appropriate positive and negative controls were run and confirmed for each sample submitted.

**Data Interpretation:** Cell lines were authenticated using Short Tandem Repeat (STR) analysis as described in 2012 in ANSI Standard (ASN-0002) Authentication of Human Cell Lines: Standardization of STR Profiling by the ATCC Standards Development Organization (SDO) and in Capes-Davis et al., Match criteria for human cell line authentication: Where do we draw the line? *Int. J. Cancer*. 2012 Nov 8. doi: 10.1002/ijc.27931

**ATCC performs STR Profiling following ISO 9001:2008 and ISO/IEC 17025:2005 quality standards.**

There are no warranties with respect to the services or results supplied, express or implied, including, without limitation, any implied warranty of merchantability or fitness for a particular purpose. Neither ATCC nor Promega is liable for any damages or injuries resulting from receipt and/or improper, inappropriate, negligent or other wrongful use of the test results supplied, and/or from misidentification, misrepresentation, or lack of accuracy of those results. Your exclusive remedy against ATCC, Promega and those supplying materials used in the services for any losses or damage of any kind whatsoever, whether in contract, tort, or otherwise, shall be, at Promega's option, refund of the fee paid for such service or repeat of the service.

The ATCC trademark and trade name, any and all ATCC catalog numbers are trademarks of the American Type Culture Collection. PowerPlex is a registered trademark of Promega Corporation. Applied Biosystems, ABI Prism and GeneMapper are registered trademarks of Life Technologies Corporation.

**Technical questions?**

ATCC Technical Support  
(800) 638-6597 / +1 703-365-2700  
tech@atcc.org

**Ordering questions?**

800-638-6597 or 703-365-2700  
Fax 703-365-2750  
Email: sales@atcc.org



| Test Results for Submitted Sample                                                                                                                                                                                                                                                               |                           |    |  | ATCC Reference Database Profile                                       |    |  |     |
|-------------------------------------------------------------------------------------------------------------------------------------------------------------------------------------------------------------------------------------------------------------------------------------------------|---------------------------|----|--|-----------------------------------------------------------------------|----|--|-----|
| Locus                                                                                                                                                                                                                                                                                           | Query Profile: Capan-2 P9 |    |  | Database Profile: Capan-2; Pancreatic Carcinoma; Human (Homo sapiens) |    |  |     |
| D3S1358                                                                                                                                                                                                                                                                                         | 17                        | 18 |  |                                                                       |    |  |     |
| TH01                                                                                                                                                                                                                                                                                            | 9.3                       |    |  | 9.3                                                                   |    |  |     |
| D21S11                                                                                                                                                                                                                                                                                          | 31                        |    |  |                                                                       |    |  |     |
| D18S51                                                                                                                                                                                                                                                                                          | 13                        |    |  |                                                                       |    |  |     |
| Penta_E                                                                                                                                                                                                                                                                                         | 11                        |    |  |                                                                       |    |  |     |
| D5S818                                                                                                                                                                                                                                                                                          | 11                        | 12 |  | 11                                                                    | 12 |  |     |
| D13S317                                                                                                                                                                                                                                                                                         | 11                        | 12 |  | 11                                                                    | 12 |  |     |
| D7S820                                                                                                                                                                                                                                                                                          | 9                         | 11 |  | 9                                                                     | 11 |  |     |
| D16S539                                                                                                                                                                                                                                                                                         | 9                         | 13 |  | 9                                                                     | 13 |  |     |
| CSF1PO                                                                                                                                                                                                                                                                                          | 11                        | 12 |  | 11                                                                    | 12 |  |     |
| Penta_D                                                                                                                                                                                                                                                                                         | 13                        | 15 |  |                                                                       |    |  |     |
| Amelogenin                                                                                                                                                                                                                                                                                      | X                         |    |  | X                                                                     |    |  |     |
| vWA                                                                                                                                                                                                                                                                                             | 17                        |    |  | 17                                                                    |    |  |     |
| D8S1179                                                                                                                                                                                                                                                                                         | 12                        | 13 |  |                                                                       |    |  |     |
| TPOX                                                                                                                                                                                                                                                                                            | 8                         |    |  | 8                                                                     |    |  |     |
| FGA                                                                                                                                                                                                                                                                                             | 21                        | 24 |  |                                                                       |    |  |     |
| D19S433                                                                                                                                                                                                                                                                                         | 13                        | 15 |  |                                                                       |    |  |     |
| D2S1338                                                                                                                                                                                                                                                                                         | 19                        | 25 |  |                                                                       |    |  |     |
| Number of shared alleles between query sample and database profile:                                                                                                                                                                                                                             |                           |    |  |                                                                       |    |  | 14  |
| Total number of alleles in the database profile:                                                                                                                                                                                                                                                |                           |    |  |                                                                       |    |  | 14  |
| Percent match between the submitted sample and the database profile:                                                                                                                                                                                                                            |                           |    |  |                                                                       |    |  | 100 |
| <i>The allele match algorithm compares the 8 core loci plus amelogenin only, even though alleles from all loci will be reported when available.</i>                                                                                                                                             |                           |    |  |                                                                       |    |  |     |
| <b>NOTE:</b> Loci highlighted in grey (8 core STR loci plus Amelogenin) can be made public to verify cell identity. In order to protect the identity of the donor, <b>please do not publish</b> the allele calls from all the STR loci tested. Electropherograms showing raw data are attached. |                           |    |  |                                                                       |    |  |     |

**Explanation of Test Results**

Cell lines with 80% match are considered to be related; i.e., derived from a common ancestry. Cell lines with between a 55% to 80% match require further profiling for authentication of relatedness.

- The submitted sample profile is human, but not a match for any profile in the ATCC STR database.
- The submitted profile is an exact match for the following ATCC human cell line(s) in the ATCC STR database (8 core loci plus Amelogenin): HTB-80
- The submitted profile is similar to the following ATCC human cell line(s):
- An STR profile could not be generated.

**Additional Comments:**

n/a

|                          |                  |
|--------------------------|------------------|
| e-Signature, Technician: | lchamp 3/30/2022 |
| e-Signature, Reviewer:   | Bchase 3/30/2022 |

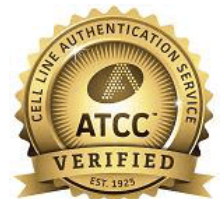

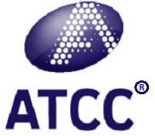

**Addendum: Comparative Output from the ATCC STR Profile Database**

| % Match | ATCC® Cat. No. | Designation                                         | D5S818 | D13S317 | D7S820 | D16S539 | vWA | TH01 | AMEL | TPOX | CSF1PO |
|---------|----------------|-----------------------------------------------------|--------|---------|--------|---------|-----|------|------|------|--------|
| 100     | STRB8050       | Capan-2 P9                                          | 11,12  | 11,12   | 9,11   | 9,13    | 17  | 9.3  | X    | 8    | 11,12  |
| 100     | HTB-80         | Capan-2; Pancreatic Carcinoma; Human (Homo sapiens) | 11,12  | 11,12   | 9,11   | 9,13    | 17  | 9.3  | X    | 8    | 11,12  |

**Definitions of terms used in this report:**

**Peak Area Difference (PAD):**

Refers to a heterozygous peak imbalance.

Two alleles at a single locus should amplify in a similar manner; and therefore produce peaks of similar height and area. Peaks which are above threshold (50 rfu) but are not of similar area, within 50% of each other, are referred to as a PAD. Due to their nature cell lines do not amplify in the same manner as a sample taken from a fresh buccal swab. PAD is far more common in cell line samples.

**Stutter:**

A stutter peak is a small peak which occurs immediately before the true peak. It is defined as being a single repeat unit smaller than the true peak. The stutter peak should be less than 15% of the true peak. The stutter is caused by the polymerase.

**+4 Peak:**

A +4 is similar to a stutter but occurs immediately after the true peak. A stutter peak should be less than 5% for a homozygous and 10% for a heterozygous.

**Below Threshold Peak(s):**

Cell lines can produce unusual profiles and occasionally a peak will amplify poorly and be below threshold. Where we find a below threshold peak which we believe is valid we indicate it as a below threshold peak. Our cell line analysis criteria, Homozygous and Heterozygous peaks must be equal to or above the set height threshold for it to be considered a true peak.

**Ladder/ Off Ladder Peak(s):**

The allelic ladder consists of most or all known alleles in the population and allows for precise assignment of alleles. Those which do not align are termed 'off ladder'.

**Artifact:**

A non-allelic product of the amplification process, an anomaly of the detection process, or a by-product of primer synthesis

**Pull-up:**

A term used to describe when signal from one dye color channel produces artificial peaks in another, usually adjacent, color.

**Spike:**

An extraneous peak resulting from dust, dried polymer, an air bubble, or an electrical surge.

**Dye blob:**

Free dye not coupled to primer that can be injected into the capillary (A known and documented dye blob is often found at the D3S1358 locus.)



Sample Name

STRB8050 Capan-2 P9

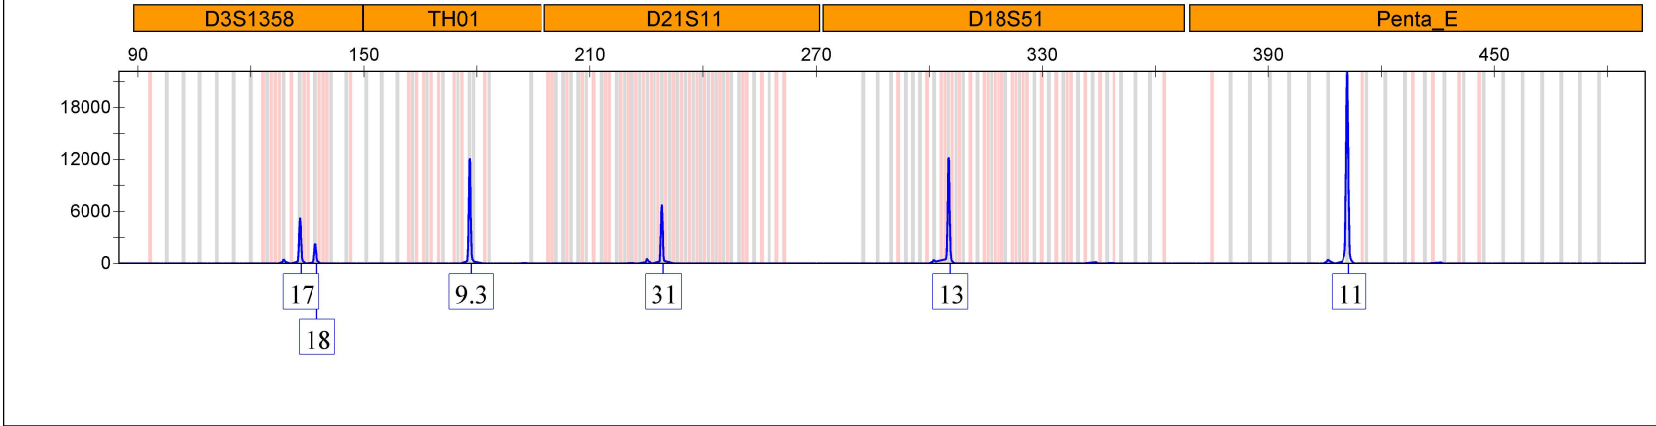

STRB8050 Capan-2 P9

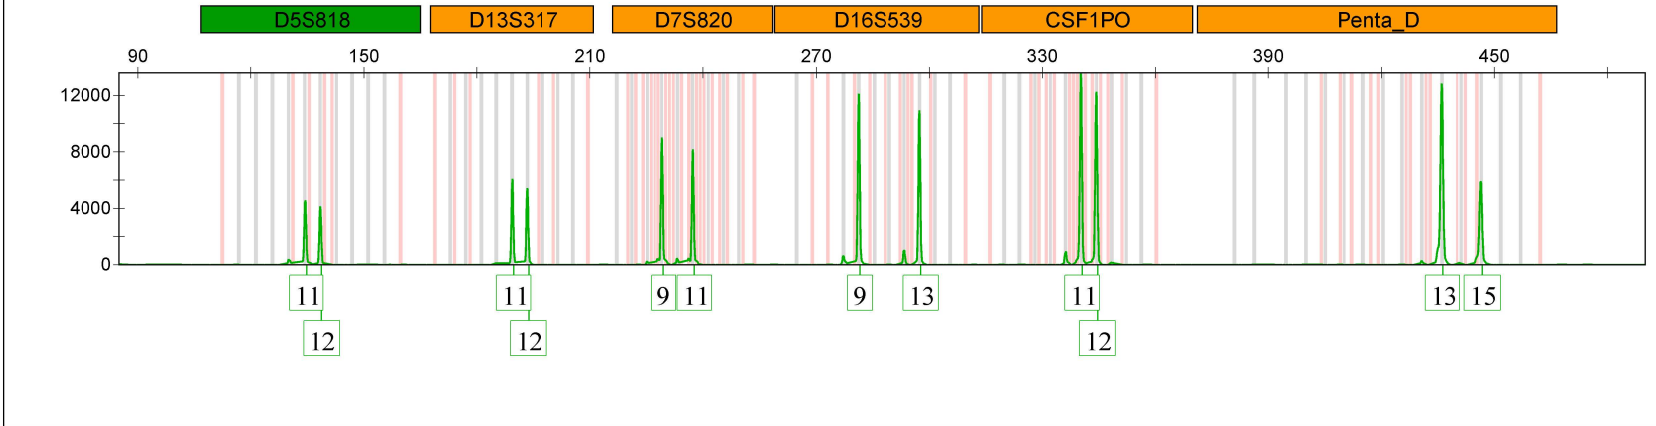

Sample Name

STRB8050 Capan-2 P9

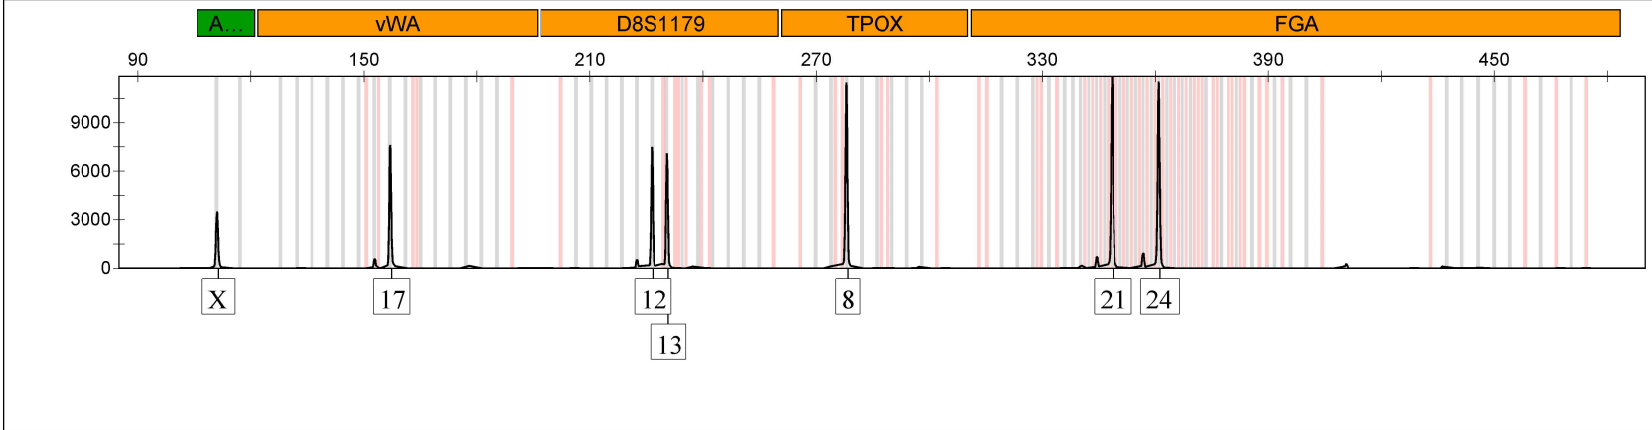

STRB8050 Capan-2 P9

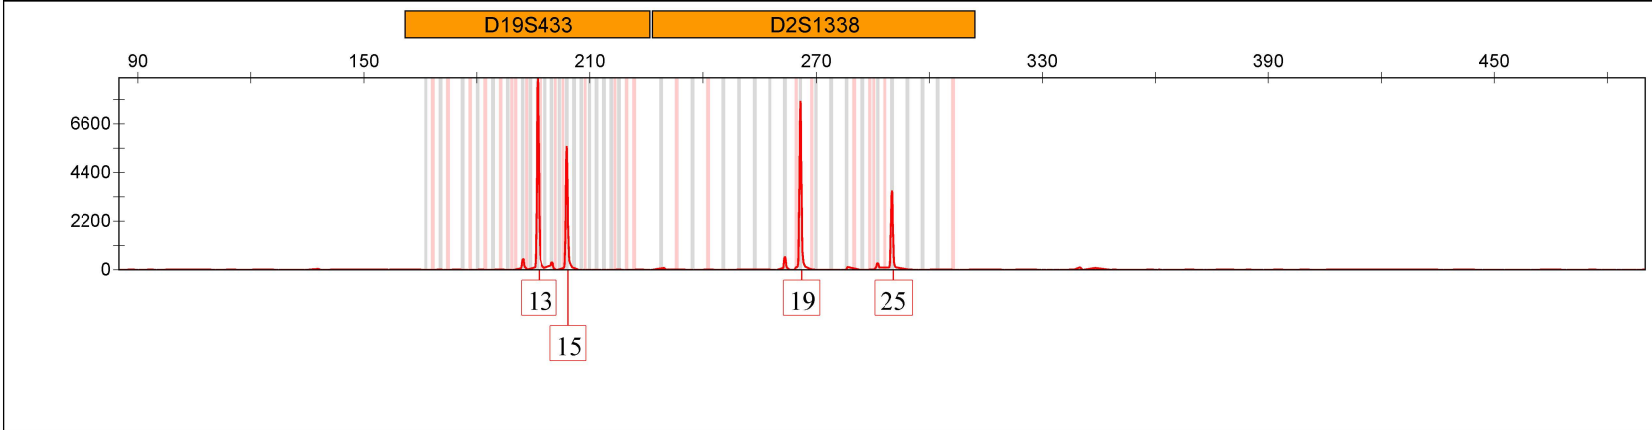



# Cell Line Authentication Service

## STR Profile Report

**Sample Submitted By:** National Institutes of Health  
Shouhui Yang

**Email Address:** shouhui.yang@nih.gov

**ATCC Sales Order:** SO0895664

**FTA Barcode:** STRB8042

**Cell Line Designation:** ASPC-1

**Date Sample Received:** Monday, March 28, 2022

**Report Date:** Wednesday, March 30, 2022

**Methodology:** Seventeen short tandem repeat (STR) loci plus the gender determining locus, Amelogenin, were amplified using the commercially available PowerPlex® 18D Kit from Promega. The cell line sample was processed using the ABI Prism® 3500xl Genetic Analyzer. Data were analyzed using GeneMapper® ID-X v1.2 software (Applied Biosystems). Appropriate positive and negative controls were run and confirmed for each sample submitted.

**Data Interpretation:** Cell lines were authenticated using Short Tandem Repeat (STR) analysis as described in 2012 in ANSI Standard (ASN-0002) Authentication of Human Cell Lines: Standardization of STR Profiling by the ATCC Standards Development Organization (SDO) and in Capes-Davis et al., Match criteria for human cell line authentication: Where do we draw the line? *Int. J. Cancer.* 2012 Nov 8. doi: 10.1002/ijc.27931

### **ATCC performs STR Profiling following ISO 9001:2008 and ISO/IEC 17025:2005 quality standards.**

There are no warranties with respect to the services or results supplied, express or implied, including, without limitation, any implied warranty of merchantability or fitness for a particular purpose. Neither ATCC nor Promega is liable for any damages or injuries resulting from receipt and/or improper, inappropriate, negligent or other wrongful use of the test results supplied, and/or from misidentification, misrepresentation, or lack of accuracy of those results. Your exclusive remedy against ATCC, Promega and those supplying materials used in the services for any losses or damage of any kind whatsoever, whether in contract, tort, or otherwise, shall be, at Promega's option, refund of the fee paid for such service or repeat of the service.

The ATCC trademark and trade name, any and all ATCC catalog numbers are trademarks of the American Type Culture Collection. PowerPlex is a registered trademark of Promega Corporation. Applied Biosystems, ABI Prism and GeneMapper are registered trademarks of Life Technologies Corporation.

### **Technical questions?**

ATCC Technical Support  
(800) 638-6597 / +1 703-365-2700  
tech@atcc.org

### **Ordering questions?**

800-638-6597 or 703-365-2700  
Fax 703-365-2750  
Email: sales@atcc.org



| Test Results for Submitted Sample                                                                                                                                                                                                                                                               |                       |     |  | ATCC Reference Database Profile                                   |     |  |     |
|-------------------------------------------------------------------------------------------------------------------------------------------------------------------------------------------------------------------------------------------------------------------------------------------------|-----------------------|-----|--|-------------------------------------------------------------------|-----|--|-----|
| Locus                                                                                                                                                                                                                                                                                           | Query Profile: ASPC-1 |     |  | Database Profile: AsPC-1; Pancreatic Cancer; Human (Homo sapiens) |     |  |     |
| D3S1358                                                                                                                                                                                                                                                                                         | 16                    |     |  |                                                                   |     |  |     |
| TH01                                                                                                                                                                                                                                                                                            | 7                     | 9.3 |  | 7                                                                 | 9.3 |  |     |
| D21S11                                                                                                                                                                                                                                                                                          | 28                    | 30  |  |                                                                   |     |  |     |
| D18S51                                                                                                                                                                                                                                                                                          | 18                    |     |  |                                                                   |     |  |     |
| Penta_E                                                                                                                                                                                                                                                                                         | 5                     | 12  |  |                                                                   |     |  |     |
| D5S818                                                                                                                                                                                                                                                                                          | 12                    |     |  | 12                                                                |     |  |     |
| D13S317                                                                                                                                                                                                                                                                                         | 9                     | 12  |  | 9                                                                 | 12  |  |     |
| D7S820                                                                                                                                                                                                                                                                                          | 12                    | 13  |  | 12                                                                | 13  |  |     |
| D16S539                                                                                                                                                                                                                                                                                         | 11                    |     |  | 11                                                                |     |  |     |
| CSF1PO                                                                                                                                                                                                                                                                                          | 10                    | 13  |  | 10                                                                | 13  |  |     |
| Penta_D                                                                                                                                                                                                                                                                                         | 9                     | 12  |  |                                                                   |     |  |     |
| Amelogenin                                                                                                                                                                                                                                                                                      | X                     |     |  | X                                                                 |     |  |     |
| vWA                                                                                                                                                                                                                                                                                             | 17                    |     |  | 17                                                                |     |  |     |
| D8S1179                                                                                                                                                                                                                                                                                         | 13                    | 15  |  |                                                                   |     |  |     |
| TPOX                                                                                                                                                                                                                                                                                            | 8                     | 10  |  | 8                                                                 | 10  |  |     |
| FGA                                                                                                                                                                                                                                                                                             | 24                    |     |  |                                                                   |     |  |     |
| D19S433                                                                                                                                                                                                                                                                                         | 14                    |     |  |                                                                   |     |  |     |
| D2S1338                                                                                                                                                                                                                                                                                         | 22                    | 23  |  |                                                                   |     |  |     |
| Number of shared alleles between query sample and database profile:                                                                                                                                                                                                                             |                       |     |  |                                                                   |     |  | 14  |
| Total number of alleles in the database profile:                                                                                                                                                                                                                                                |                       |     |  |                                                                   |     |  | 14  |
| Percent match between the submitted sample and the database profile:                                                                                                                                                                                                                            |                       |     |  |                                                                   |     |  | 100 |
| <i>The allele match algorithm compares the 8 core loci plus amelogenin only, even though alleles from all loci will be reported when available.</i>                                                                                                                                             |                       |     |  |                                                                   |     |  |     |
| <b>NOTE:</b> Loci highlighted in grey (8 core STR loci plus Amelogenin) can be made public to verify cell identity. In order to protect the identity of the donor, <b>please do not publish</b> the allele calls from all the STR loci tested. Electropherograms showing raw data are attached. |                       |     |  |                                                                   |     |  |     |

**Explanation of Test Results**

Cell lines with 80% match are considered to be related; i.e., derived from a common ancestry. Cell lines with between a 55% to 80% match require further profiling for authentication of relatedness.

- The submitted sample profile is human, but not a match for any profile in the ATCC STR database.
- The submitted profile is an exact match for the following ATCC human cell line(s) in the ATCC STR database (8 core loci plus Amelogenin): CRL-1682
- The submitted profile is similar to the following ATCC human cell line(s):
- An STR profile could not be generated.

**Additional Comments:**

n/a

|                          |                  |
|--------------------------|------------------|
| e-Signature, Technician: | lchamp 3/30/2022 |
| e-Signature, Reviewer:   | Bchase 3/30/2022 |





**Addendum: Comparative Output from the ATCC STR Profile Database**

| % Match | ATCC® Cat. No. | Designation                                     | D5S818 | D13S317 | D7S820 | D16S539 | vWA | TH01  | AMEL | TPOX | CSF1PO |
|---------|----------------|-------------------------------------------------|--------|---------|--------|---------|-----|-------|------|------|--------|
| 100     | STRB8042       | ASPC-1                                          | 12     | 9,12    | 12,13  | 11      | 17  | 7,9,3 | X    | 8,10 | 10,13  |
| 100     | CRL-1682       | AsPC-1; Pancreatic Cancer; Human (Homo sapiens) | 12     | 9,12    | 12,13  | 11      | 17  | 7,9,3 | X    | 8,10 | 10,13  |

**Definitions of terms used in this report:**

**Peak Area Difference (PAD):**

Refers to a heterozygous peak imbalance.

Two alleles at a single locus should amplify in a similar manner; and therefore produce peaks of similar height and area. Peaks which are above threshold (50 rfu) but are not of similar area, within 50% of each other, are referred to as a PAD. Due to their nature cell lines do not amplify in the same manner as a sample taken from a fresh buccal swab. PAD is far more common in cell line samples.

**Stutter:**

A stutter peak is a small peak which occurs immediately before the true peak. It is defined as being a single repeat unit smaller than the true peak. The stutter peak should be less than 15% of the true peak. The stutter is caused by the polymerase.

**+4 Peak:**

A +4 is similar to a stutter but occurs immediately after the true peak. A stutter peak should be less than 5% for a homozygous and 10% for a heterozygous.

**Below Threshold Peak(s):**

Cell lines can produce unusual profiles and occasionally a peak will amplify poorly and be below threshold. Where we find a below threshold peak which we believe is valid we indicate it as a below threshold peak. Our cell line analysis criteria, Homozygous and Heterozygous peaks must be equal to or above the set height threshold for it to be considered a true peak.

**Ladder/ Off Ladder Peak(s):**

The allelic ladder consists of most or all known alleles in the population and allows for precise assignment of alleles. Those which do not align are termed 'off ladder'.

**Artifact:**

A non-allelic product of the amplification process, an anomaly of the detection process, or a by-product of primer synthesis

**Pull-up:**

A term used to describe when signal from one dye color channel produces artificial peaks in another, usually adjacent, color.

**Spike:**

An extraneous peak resulting from dust, dried polymer, an air bubble, or an electrical surge.

**Dye blob:**

Free dye not coupled to primer that can be injected into the capillary (A known and documented dye blob is often found at the D3S1358 locus.)

Sample Name

STRB8042 ASPC-1

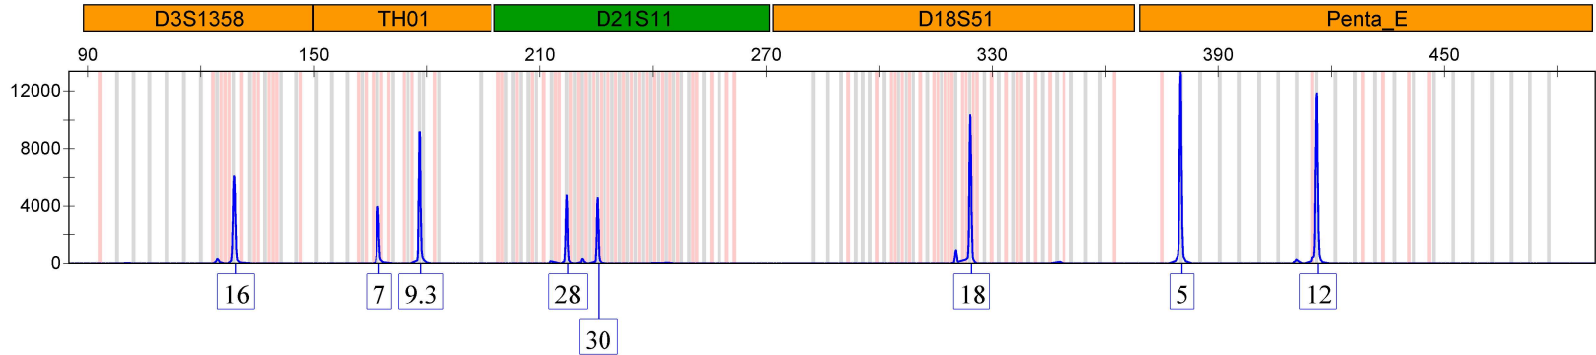

STRB8042 ASPC-1

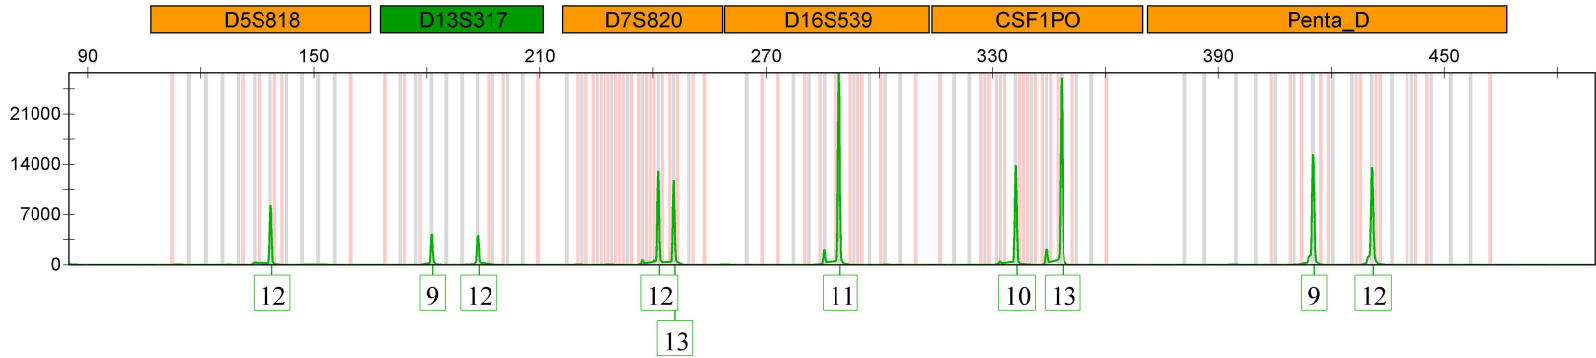

Sample Name  
STRB8042 ASPC-1

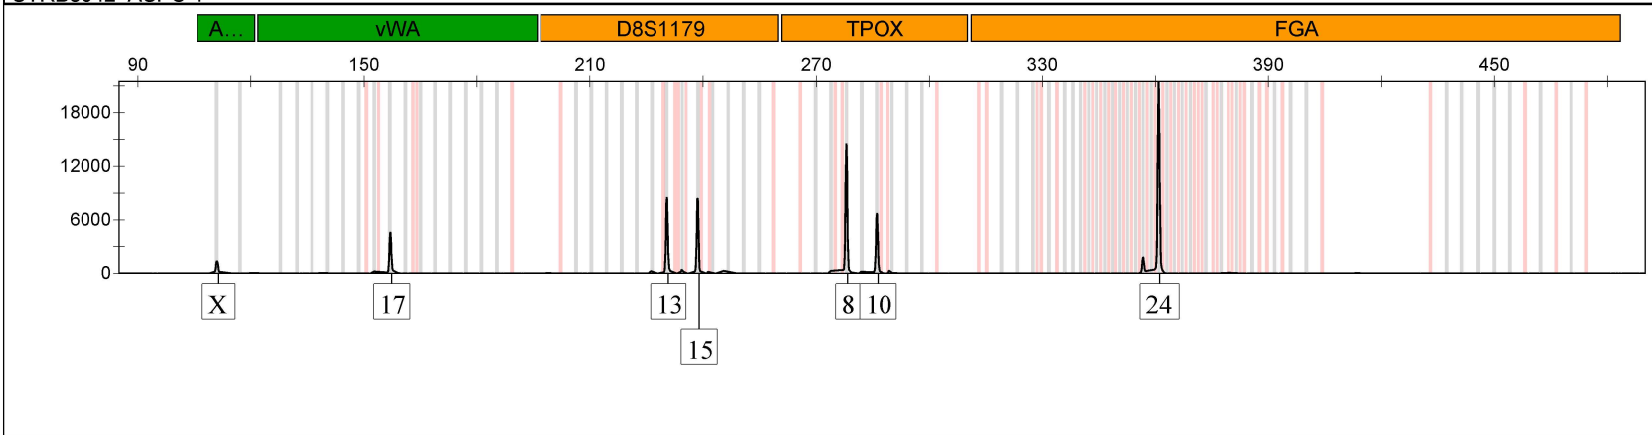

STRB8042 ASPC-1

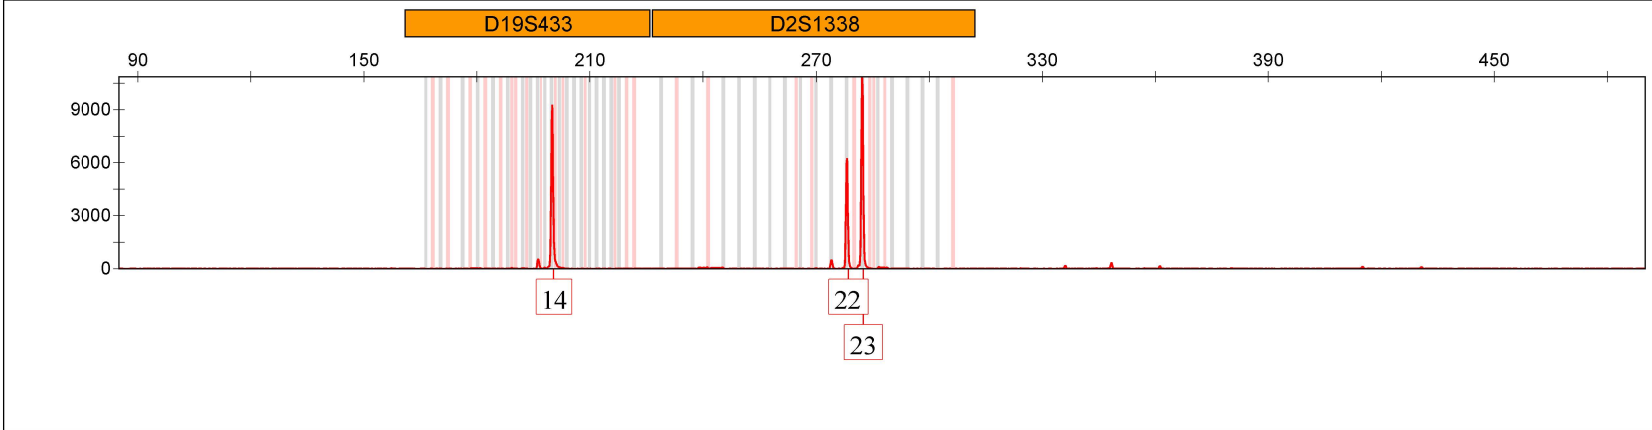

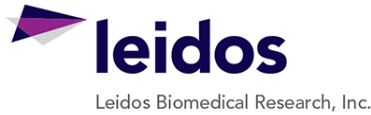

# Frederick National Laboratory for Cancer Research

---

DATE: July 10<sup>th</sup>, 2015

TO: Perwez Hussain, Ph.D.

THROUGH: Carissa Grose  
Group Leader, Cloning and Nucleic Acids  
Protein Expression Laboratory

FROM: Allison Meade  
Research Associate I  
Molecular Detection Group  
Protein Expression Laboratory

SUBJECT: Short Tandem Repeat Analysis (STR) CSAS 17674

SAMPLES: 7 cell lines

MDG received the above DNA samples from your laboratory for STR analysis. DNA was extracted from each sample and was amplified by PCR using the AmpF $\ell$ STR $\text{\textcircled{R}}$  Identifiler PCR amplification kit. This is a STR multiplex assay that amplifies 15 tetranucleotide repeat loci and the Amelogenin gender determination marker in a single PCR amplification. Sample PCR amplicon, as well as positive control amplicon, were then denatured at 95 $^{\circ}$ C and the fragments analyzed on an Applied Biosystems 3130xl genetic analyzer in Hi-Di formamide with a size standard. Fragments were labeled and identified using GeneMapper 4.0.

The resulting allelic distributions of the samples are listed in the attached table. The numerical values represent the number of tetramer repeats for each allele of the 16 target loci. The allelic distribution of the positive control is also provided as a reference.



**RESULTS:**

|            | Panc-1 | MiaPaCa-2 | Capan-1 | Capan-2  | CFPAC-1  | Pancn10.05 | ASPC-1 | Test Positive Control | Expected Positive Control |
|------------|--------|-----------|---------|----------|----------|------------|--------|-----------------------|---------------------------|
| D8S1179    | 14, 15 | 16, 16    | 14,16   | 12, 13   | 11, 15   | 13, 14     | 13, 15 | 13, 13                | 13, 13                    |
| D21S11     | 28, 28 | 29, 31.2  | 28, 30  | 31, 31   | 30, 31.2 | 30, 30     | 28, 30 | 30, 30                | 30, 30                    |
| D7S820     | 8, 10  | 12, 13    | 10, 11  | 9, 11    | 8, 10    | 8, 9       | 12, 13 | 10, 11                | 10, 11                    |
| CSF1P0     | 10, 12 | 10, 10    | 11, 11  | 11, 12   | 10, 10   | 12, 12     | 10, 13 | 10, 12                | 10, 12                    |
| D3S1358    | 17, 17 | 16, 16    | 15, 15  | 17, 18   | 16, 16   | 14, 14     | 16, 16 | 14, 15                | 14, 15                    |
| TH01       | 7, 8   | 9, 10     | 6, 6    | 9.3, 9.3 | 8, 8     | 6, 9.3     | 7, 9.3 | 8, 9.3                | 8, 9.3                    |
| D13S317    | 11, 11 | 12, 13    | 9, 9    | 11, 12   | 12, 12   | 12, 12     | 9, 12  | 11, 11                | 11, 11                    |
| D16S539    | 11, 11 | 10, 13    | 13, 14  | 9, 13    | 9, 11    | 9, 12      | 11, 11 | 11, 12                | 11, 12                    |
| D2S1338    | 23, 24 | 25, 25    | 20, 24  | 19, 25   | 18, 23   | 17, 18     | 22, 23 | 19, 23                | 19, 23                    |
| D19S433    | 11, 16 | 15, 15    | 14, 15  | 13, 15   | 13, 15   | 13, 14     | 14, 14 | 14, 15                | 14, 15                    |
| vWA        | 15, 15 | 15, 15    | 16, 16  | 17, 17   | 17, 17   | 16, 16     | 17, 17 | 17, 18                | 17, 18                    |
| TPOX       | 8, 11  | 9, 9      | 8, 11   | 8, 8     | 8, 8     | 11, 11     | 8, 10  | 8, 8                  | 8, 8                      |
| D18S51     | 12, 12 | 12, 12    | 12, 12  | 13, 13   | 12, 12   | 15, 15     | 18, 18 | 15, 19                | 15, 19                    |
| D5S818     | 11, 13 | 12, 13    | 11, 11  | 11, 12   | 10, 11   | 13, 13     | 12, 12 | 11, 11                | 11, 11                    |
| FGA        | 21, 21 | 22, 22    | 24, 24  | 21, 24   | 21, 22   | 20, 20     | 24, 24 | 23, 24                | 23, 24                    |
| Amelogenin | X, X   | X, X      | X, X    | X, X     | X, Y     | X, X       | X, X   | X, X                  | X, X                      |

If you have any questions, please feel free to contact me.

Allison Meade  
 ATRF, C2015  
 8560 Progress Dr.  
 Frederick, MD 21701  
 Phone: 301-846-1888  
 Fax: 301-846-6289  
 E-mail: [meadeac@mail.nih.gov](mailto:meadeac@mail.nih.gov)

Carissa Grose  
 ATRF, C2026  
 8560 Progress Dr.  
 Frederick, MD 21701  
 Phone: 301-360-3427  
 Fax: 301-846-6289  
 E-mail: [carissa.grose@nih.gov](mailto:carissa.grose@nih.gov)

**DISCLAIMER:** Characterization of a cell line by examining differences in the number of short tandem repeats (STR) is a technology originally developed for use as a forensic tool. While this technology has been applied for the identification and characterization of human tumor cell lines, there are some technical issues to be considered in the interpretation of the data obtained. Issues that may be encountered are polyploidy and increased mutation rates (loss/gain of number of STR) due to continuous cell culture<sup>1</sup>.

**References:**

<sup>1</sup> Parson W., Kirchbner R., Mühlmann R., Renner K., Kofler A., Schmidt S., Kofler R. (2005) *FASEB J.* 19, 434-436.
