# Supplementary material
Source: PubMed Central journal article supplement (PMC10122429)

Full scans of western blots

Fig 3A

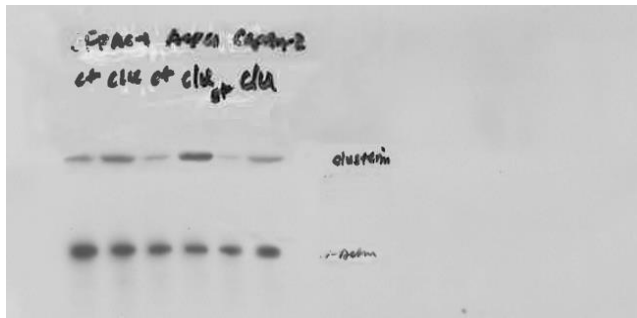

Fig. 3F

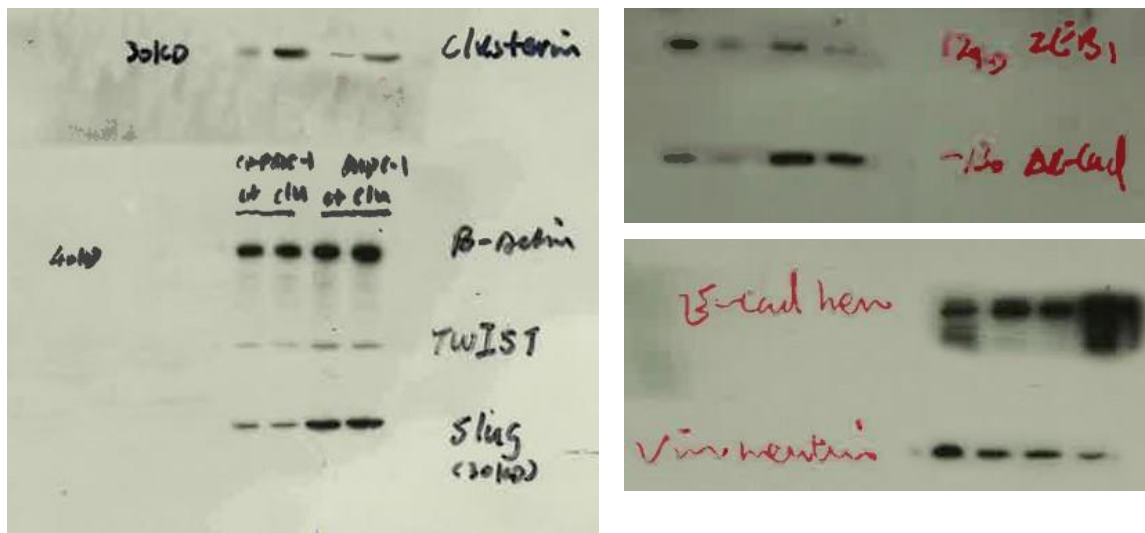

Fig. 3H

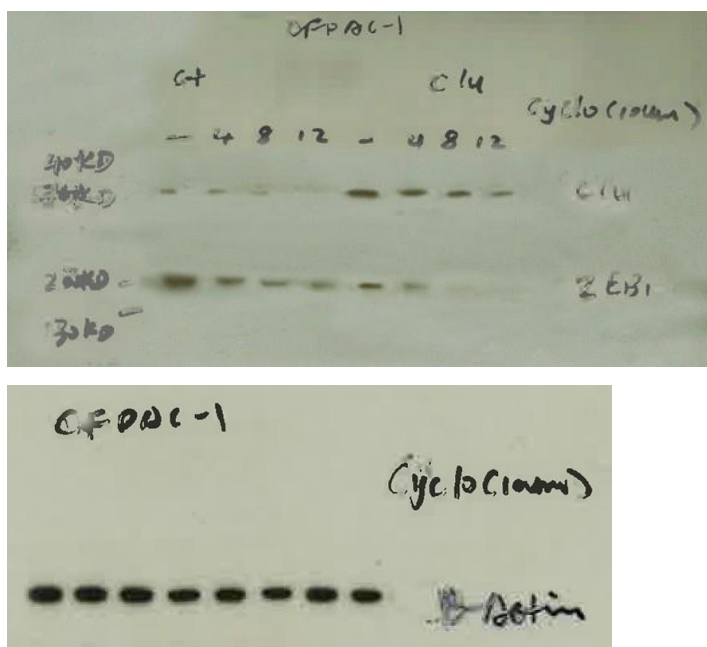

Fig. 3I

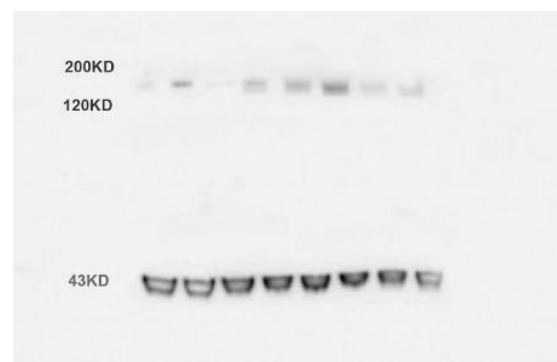

Fig. 5E

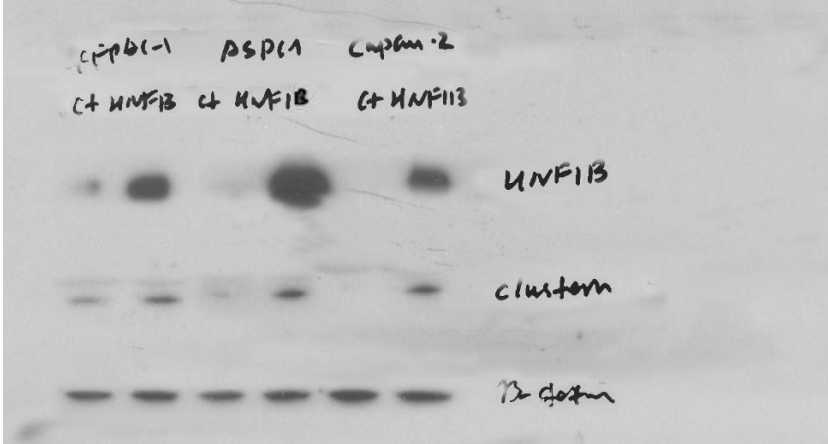

Supplementary Fig.5A

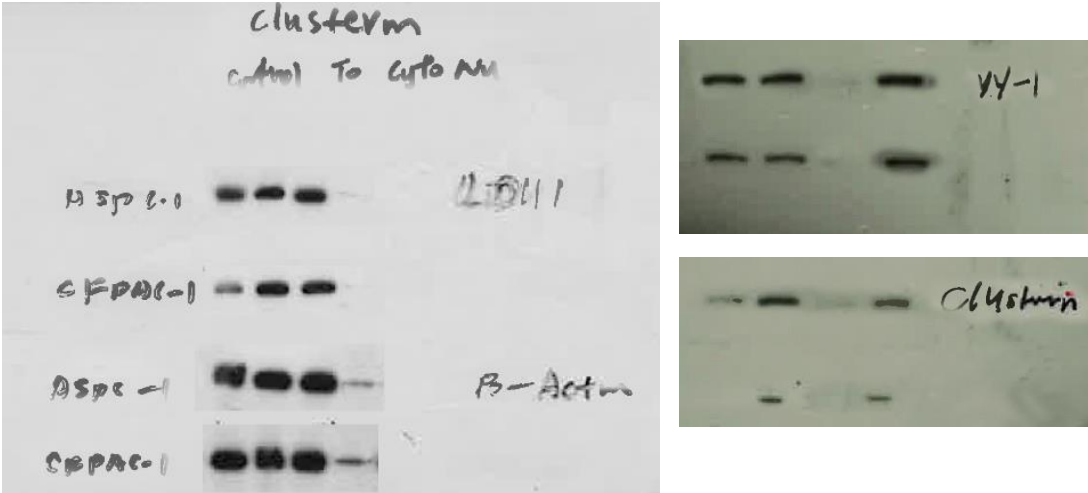

Supplement: bgac092_suppl_supplementary_data_s2.pdf [file bgac092_suppl_supplementary_data_s2.pdf]
